# Supplementary material for: Plasma N-Cleaved Galectin-9 Is a Surrogate Marker for Determining the Severity of COVID-19 and Monitoring the Therapeutic Effects of Tocilizumab
Source: MDPI journal article supplement (doi:10.3390/ijms24043591), 2023-02-10
Supplement: s1 [file s1]

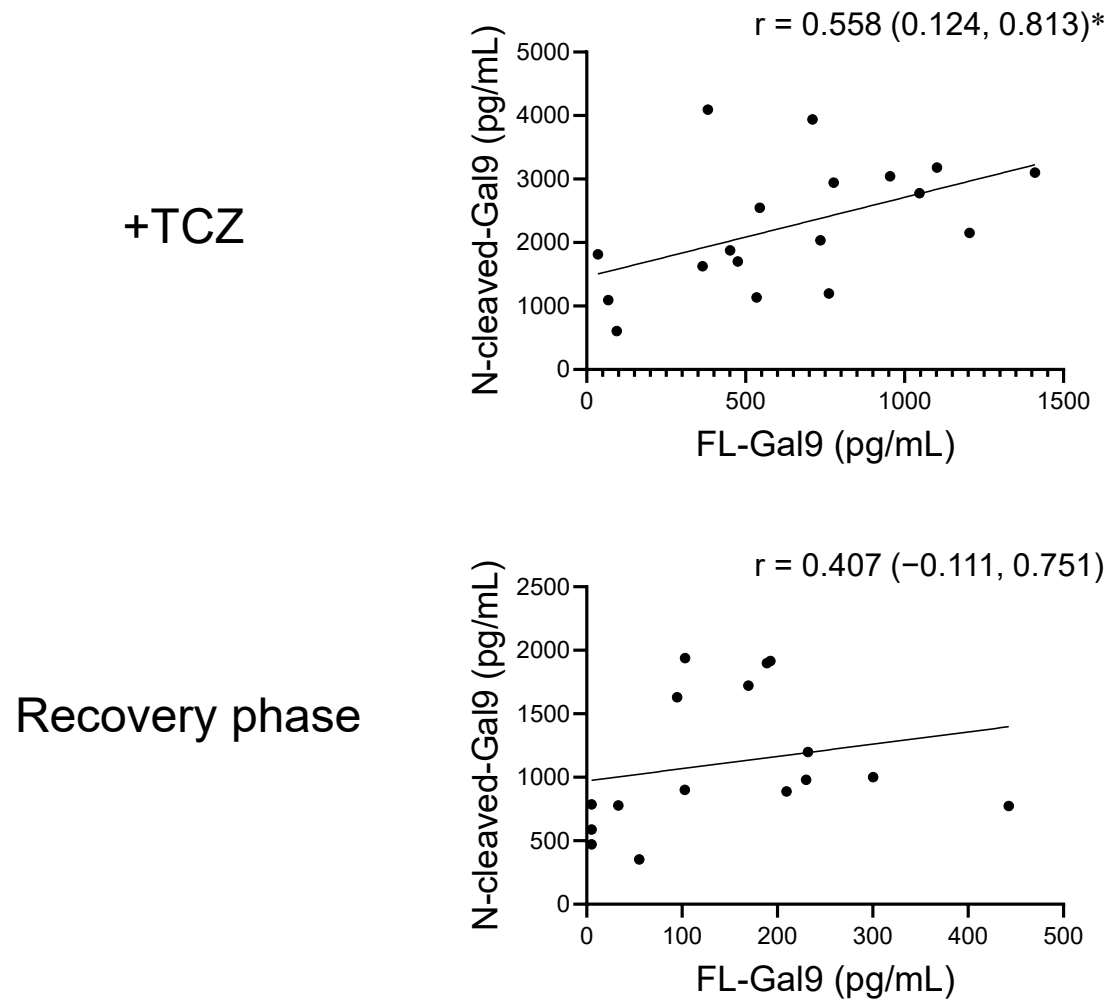

**Figure S2.** Correlations between plasma FL-Gal9 and N-cleaved-Gal9 levels during TCZ treatment. Scatter plots show Spearman's rank correlations between FL-Gal9 and N-cleaved-Gal9 levels in the period immediately before TCZ (+TCZ) and recovery phase.  $r$ : correlation coefficient, (): 95% confidence interval.  $*p < 0.05$
