# Supplementary material for: Plasma N-Cleaved Galectin-9 Is a Surrogate Marker for Determining the Severity of COVID-19 and Monitoring the Therapeutic Effects of Tocilizumab
Source: MDPI journal article supplement (doi:10.3390/ijms24043591), 2023-02-10
Supplement: s1 [file s1]

Table S5. Spearman’s rank correlations of plasma Gal-9 levels with sIL-2R levels in the patients during TCZ treatment.

|        |                | Phase    | r     | 95% CI        | p     |
|--------|----------------|----------|-------|---------------|-------|
| sIL-2R | FL-Gal9        | +TCZ     | 0.181 | -0.328, 0.609 | 0.485 |
|        |                | Recovery | 0.723 | 0.354, 0.897  | <0.01 |
|        | Tr-Gal9        | +TCZ     | 0.502 | 0.029, 0.792  | <0.05 |
|        |                | Recovery | 0.676 | 0.305, 0.869  | <0.01 |
|        | N-cleaved-Gal9 | +TCZ     | 0.556 | 0.103, 0.818  | <0.05 |
|        |                | Recovery | 0.641 | 0.213, 0.863  | <0.01 |

r: correlation coefficient, CI: confidence interval.
