# Supplementary material for: Plasma N-Cleaved Galectin-9 Is a Surrogate Marker for Determining the Severity of COVID-19 and Monitoring the Therapeutic Effects of Tocilizumab
Source: MDPI journal article supplement (doi:10.3390/ijms24043591), 2023-02-10
Supplement: s1 [file s1]

Table S1. Spearman’s rank correlations of plasma Gal9 levels with plasma MMPs and specific pathological marker levels in CP, CV, and ID.

|         |             | CP     |                |         | CV     |               |        | ID     |               |       |
|---------|-------------|--------|----------------|---------|--------|---------------|--------|--------|---------------|-------|
|         |             | r      | 95%CI          | p       | r      | 95%CI         | p      | r      | 95%CI         | p     |
| FL-Gal9 | MMP-2       | -0.204 | -0.521, 0.162  | 0.270   | 0.228  | -0.226, 0.600 | 0.321  | 0.296  | 0.003, 0.543  | <0.05 |
|         | MMP-9       | 0.397  | 0.042, 0.662   | <0.05   | -0.068 | -0.476, 0.364 | 0.762  | 0.421  | 0.112, 0.655  | <0.05 |
|         | Lymphocytes | -0.425 | -0.689, -0.062 | <0.05   | 0.376  | -0.067, 0.695 | 0.093  | ND     |               |       |
|         | Neutrophils | 0.120  | -0.265, 0.472  | 0.540   | -0.198 | -0.580, 0.255 | 0.389  | ND     |               |       |
|         | Monocytes   | 0.047  | -0.347, 0.426  | 0.822   | 0.022  | -0.414, 0.449 | 0.926  | ND     |               |       |
|         | CRP         | 0.405  | 0.059, 0.664   | <0.05   | 0.126  | -0.313, 0.520 | 0.578  | 0.088  | -0.201, 0.363 | 0.553 |
|         | sIL-2R      | 0.522  | 0.200, 0.743   | <0.01   | 0.286  | -0.166, 0.639 | 0.208  | ND     |               |       |
|         | D-dimer     | 0.523  | 0.206, 0.740   | <0.01   | 0.194  | -0.259, 0.578 | 0.3984 | 0.106  | -0.184, 0.379 | 0.474 |
|         | Ferritin    | 0.460  | 0.120, 0.704   | <0.05   | 0.369  | -0.075, 0.691 | 0.100  | 0.012  | -0.309, 0.331 | 0.942 |
|         | S/F ratio   | -0.310 | -0.599, 0.050  | 0.090   | 0.337  | -0.098, 0.664 | 0.125  | -0.127 | -0.405, 0.173 | 0.407 |
| Tr-Gal9 | MMP-2       | -0.129 | -0.457, 0.230  | 0.479   | 0.096  | -0.350, 0.507 | 0.678  | 0.023  | -0.266, 0.308 | 0.880 |
|         | MMP-9       | 0.472  | 0.142, 0.708   | <0.01   | -0.030 | -0.446, 0.397 | 0.896  | 0.337  | 0.014, 0.596  | <0.05 |
|         | Lymphocytes | -0.551 | -0.763, -0.231 | <0.01   | 0.273  | -0.168, 0.623 | 0.219  | ND     |               |       |
|         | Neutrophils | 0.274  | -0.103, 0.582  | 0.150   | -0.265 | -0.617, 0.176 | 0.233  | ND     |               |       |
|         | Monocytes   | 0.284  | -0.116, 0.605  | 0.160   | 0.053  | -0.377, 0.464 | 0.817  | ND     |               |       |
|         | CRP         | 0.519  | 0.208, 0.735   | <0.01   | 0.320  | -0.106, 0.647 | 0.137  | 0.137  | -0.147, 0.400 | 0.343 |
|         | sIL-2R      | 0.657  | 0.394, 0.820   | <0.0001 | 0.266  | -0.187, 0.626 | 0.242  | ND     |               |       |
|         | D-dimer     | 0.650  | 0.390, 0.814   | <0.0001 | 0.201  | -0.241, 0.574 | 0.370  | 0.221  | -0.061, 0.471 | 0.122 |

|                       |                    |        |                |         |        |               |       |        |               |       |
|-----------------------|--------------------|--------|----------------|---------|--------|---------------|-------|--------|---------------|-------|
|                       | <b>Ferritin</b>    | 0.579  | 0.283, 0.774   | <0.001  | 0.206  | -0.236, 0.578 | 0.357 | 0.126  | -0.193, 0.421 | 0.437 |
|                       | <b>S/F ratio</b>   | -0.540 | -0.748, -0.236 | <0.01   | 0.405  | -0.009, 0.700 | 0.056 | -0.078 | -0.358, 0.214 | 0.600 |
| <b>N-cleaved-Gal9</b> | <b>MMP-2</b>       | -0.252 | -0.557, 0.112  | 0.171   | -0.003 | -0.434, 0.430 | 0.991 | -0.066 | -0.347, 0.225 | 0.658 |
|                       | <b>MMP-9</b>       | 0.519  | 0.195, 0.741   | <0.01   | -0.014 | -0.433, 0.410 | 0.952 | 0.200  | -0.132, 0.492 | 0.234 |
|                       | <b>Lymphocytes</b> | -0.527 | -0.752, 0.191  | <0.01   | 0.078  | -0.366, 0.493 | 0.737 | ND     |               |       |
|                       | <b>Neutrophils</b> | 0.305  | -0.076, 0.609  | 0.114   | -0.214 | -0.591, 0.240 | 0.349 | ND     |               |       |
|                       | <b>Monocytes</b>   | 0.381  | -0.008, 0.669  | 0.055   | 0.256  | -0.198, 0.619 | 0.262 | ND     |               |       |
|                       | <b>CRP</b>         | 0.570  | 0.270, 0.769   | <0.01   | 0.465  | 0.054, 0.741  | <0.05 | 0.147  | -0.137, 0.409 | 0.308 |
|                       | <b>sIL-2R</b>      | 0.789  | 0.598, 0.895   | <0.0001 | 0.181  | -0.272, 0.568 | 0.432 | ND     |               |       |
|                       | <b>D-dimer</b>     | 0.656  | 0.392, 0.820   | <0.0001 | -0.039 | -0.463, 0.399 | 0.867 | 0.208  | -0.075, 0.460 | 0.148 |
|                       | <b>Ferritin</b>    | 0.577  | 0.273, 0.776   | <0.01   | -0.058 | -0.478, 0.383 | 0.801 | 0.133  | -0.186, 0.427 | 0.413 |
|                       | <b>S/F ratio</b>   | -0.608 | -0.792, -0.323 | <0.001  | 0.363  | -0.069, 0.681 | 0.097 | -0.052 | -0.334, 0.239 | 0.729 |

r: correlation coefficient, CI: confidence interval, ND: no data.
