# Supplementary material for: Plasma N-Cleaved Galectin-9 Is a Surrogate Marker for Determining the Severity of COVID-19 and Monitoring the Therapeutic Effects of Tocilizumab
Source: MDPI journal article supplement (doi:10.3390/ijms24043591), 2023-02-10
Supplement: s1 [file s1]

Table S4. Laboratory findings of CP patients treated with and without TCZ at their initial visits.

|                          | TCZ (-)               | TCZ (+)             | <i>p</i> value |
|--------------------------|-----------------------|---------------------|----------------|
| <b>n</b>                 | 13                    | 19                  | -              |
| <b>Lymphocytes (/μL)</b> | 1226 (944.3-1689)     | 836.0 (532.5-1143)  | 0.0647         |
| <b>Neutrophils (/μL)</b> | 3279 (2418-4318)      | 4720 (3038-5830)    | 0.0594         |
| <b>Monocytes (/μL)</b>   | 480.0 (408.0-569.6)   | 495.0 (418.0-660.0) | 0.4823         |
| <b>CRP (mg/dL)</b>       | 1.940 (1.010-4.740)   | 8.870 (4.380-11.00) | <0.01          |
| <b>sIL-2R (U/mL)</b>     | 725.5 (518.0-969.0)   | 953.0 (718.0-1188)  | 0.0699         |
| <b>D-dimer (μg/mL)</b>   | 0.9200 (0.6850-1.160) | 1.360 (1.200-1.805) | <0.01          |
| <b>Ferritin (ng/mL)</b>  | 357.0 (219.3-711.8)   | 638.0 (460.0-1368)  | 0.0531         |
| <b>S/F ratio</b>         | 457.1 (442.9-464.3)   | 321.4 (219.5-457.1) | <0.01          |

TCZ (+): CP patients treated with TCZ, TCZ (-): CP patients not treated with TCZ, the median value for each parameter was indicated with IQR, (): IQR.
