# Supplementary material for: Plasma N-Cleaved Galectin-9 Is a Surrogate Marker for Determining the Severity of COVID-19 and Monitoring the Therapeutic Effects of Tocilizumab
Source: MDPI journal article supplement (doi:10.3390/ijms24043591), 2023-02-10
Supplement: s1 [file s1]

Table S6. Accuracies of plasma Gal-9 and specific pathological marker levels for discriminating the period immediately before TCZ administration from the recovery phase.

|                       | AUC    | Standard error | Cut off | Youden Index | Sensitivity | Specificity |
|-----------------------|--------|----------------|---------|--------------|-------------|-------------|
| <b>FL-Gal9</b>        | 0.8750 | 0.06595        | 332.5   | 0.7708       | 0.9375      | 0.8333      |
| <b>Tr-Gal9</b>        | 0.8860 | 0.05633        | 2143    | 0.6667       | 1.000       | 0.6667      |
| <b>N-cleaved-Gal9</b> | 0.8438 | 0.06694        | 1048    | 0.5694       | 0.6250      | 0.9444      |
| <b>CRP</b>            | 0.9972 | 0.004629       | 2.100   | 0.9474       | 1.000       | 0.9474      |
| <b>sIL-2R</b>         | 0.7099 | 0.08912        | 720.5   | 0.4445       | 0.6667      | 0.7778      |
| <b>D-dimer</b>        | 0.7368 | 0.08834        | 1.000   | 0.5205       | 0.6316      | 0.8889      |
| <b>Ferritin</b>       | 0.6543 | 0.09234        | 914.0   | 0.2778       | 0.8889      | 0.3889      |
| <b>S/F ratio</b>      | 0.8567 | 0.06638        | 428.6   | 0.6812       | 0.9444      | 0.7368      |
