# Supplementary material for: Plasma N-Cleaved Galectin-9 Is a Surrogate Marker for Determining the Severity of COVID-19 and Monitoring the Therapeutic Effects of Tocilizumab
Source: MDPI journal article supplement (doi:10.3390/ijms24043591), 2023-02-10
Supplement: s1 [file s1]

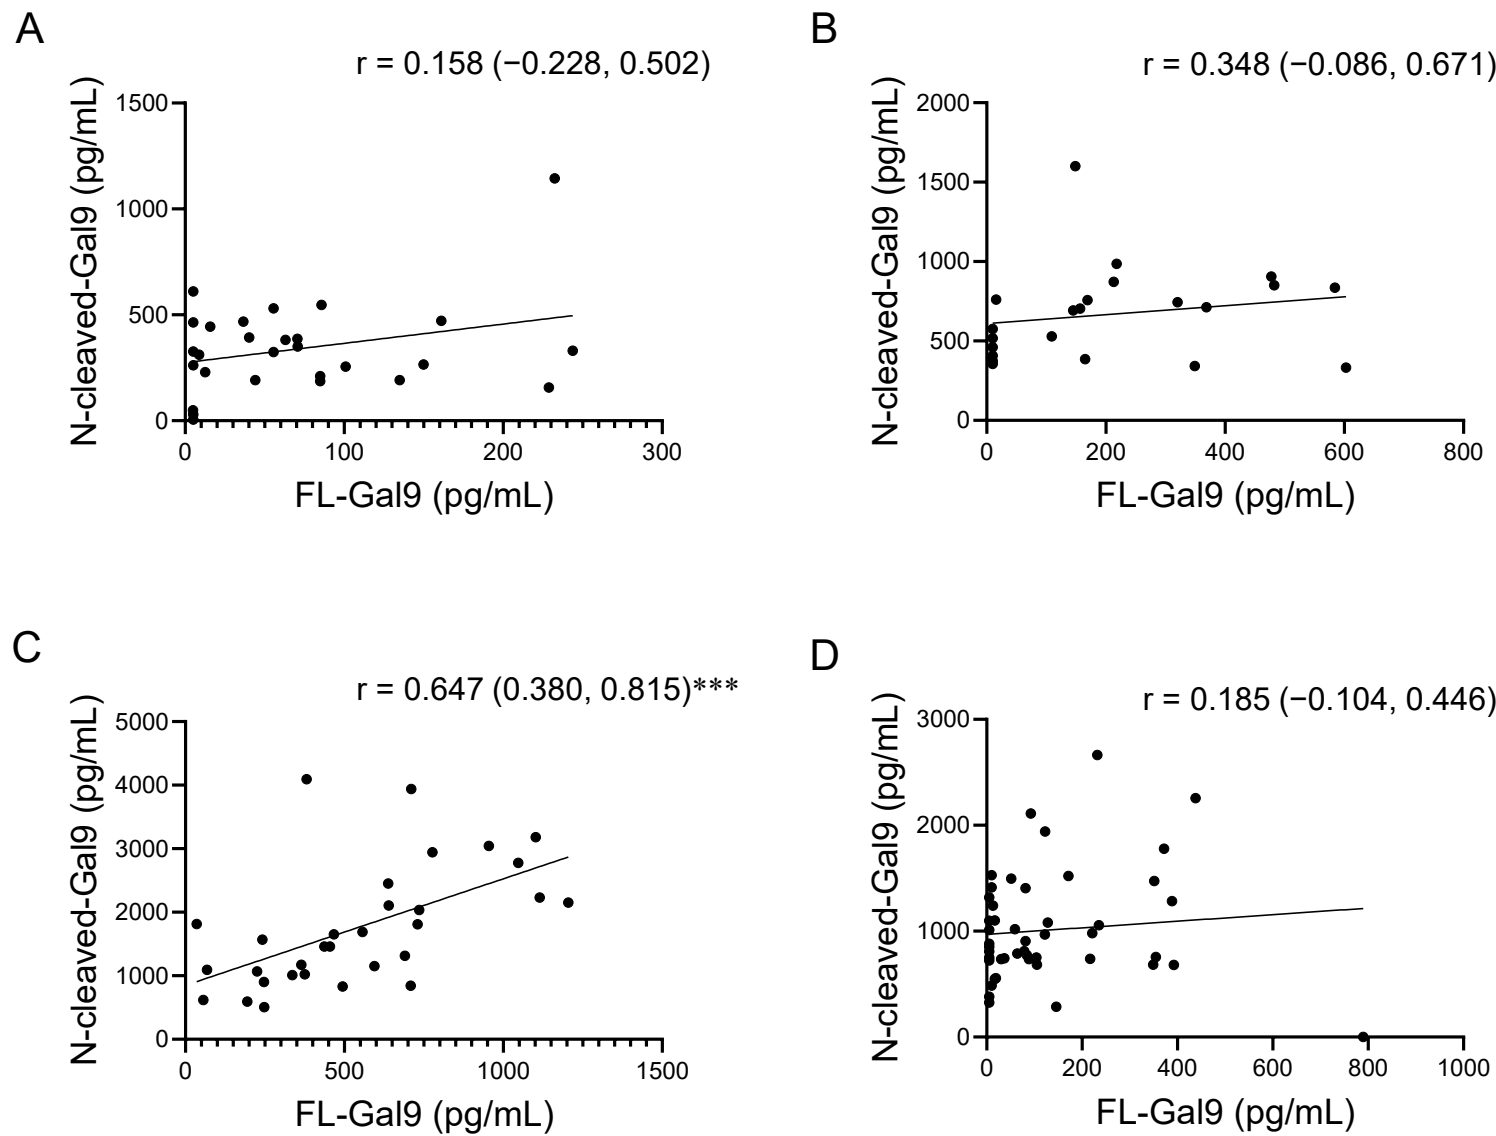

**Figure S1.** Correlations between plasma FL-Gal9 and N-cleaved-Gal9 levels in healthy controls, CV, CP, and ID (A-D). Scatter plots show Spearman's rank correlations between FL-Gal9 and N-cleaved-Gal9 levels in A) healthy controls, B) CV, C) CP, and D) ID.  $r$ : correlation coefficient, ( ): 95% confidence interval. \*\*\* $p < 0.001$ .
