# Supplementary material for: Plasma N-Cleaved Galectin-9 Is a Surrogate Marker for Determining the Severity of COVID-19 and Monitoring the Therapeutic Effects of Tocilizumab
Source: MDPI journal article supplement (doi:10.3390/ijms24043591), 2023-02-10
Supplement: s1 [file s1]

Table S3. Accuracies of plasma Gal-9 and specific pathological marker levels for discriminating CV from CP.

|                       | AUC    | Standard error | Cut off | Youden Index | Sensitivity | Specificity |
|-----------------------|--------|----------------|---------|--------------|-------------|-------------|
| <b>FL-Gal9</b>        | 0.8270 | 0.05597        | 221.6   | 0.5528       | 0.871       | 0.6818      |
| <b>Tr-Gal9</b>        | 0.8872 | 0.04363        | 1117    | 0.6454       | 0.9063      | 0.7391      |
| <b>N-cleaved-Gal9</b> | 0.9076 | 0.04050        | 998.7   | 0.761        | 0.8065      | 0.9545      |
| <b>Lymphocytes</b>    | 0.7555 | 0.06876        | 1246    | 0.4968       | 0.7241      | 0.7727      |
| <b>Neutrophils</b>    | 0.7555 | 0.06834        | 2990    | 0.417        | 0.6897      | 0.7273      |
| <b>Monocytes</b>      | 0.7570 | 0.07340        | 391.7   | 0.5735       | 0.8462      | 0.7273      |
| <b>CRP</b>            | 0.9511 | 0.03159        | 0.5300  | 0.8628       | 0.9063      | 0.9565      |
| <b>sIL-2R</b>         | 0.8118 | 0.05883        | 721.0   | 0.5806       | 0.5806      | 1.0000      |
| <b>D-dimer</b>        | 0.7479 | 0.07243        | 0.5700  | 0.4518       | 0.9063      | 0.5455      |
| <b>Ferritin</b>       | 0.8827 | 0.04669        | 292.5   | 0.6833       | 0.7742      | 0.9091      |
| <b>S/F ratio</b>      | 0.8139 | 0.05730        | 459.5   | 0.5014       | 0.7188      | 0.7826      |
