# Supplementary material for: Plasma N-Cleaved Galectin-9 Is a Surrogate Marker for Determining the Severity of COVID-19 and Monitoring the Therapeutic Effects of Tocilizumab
Source: MDPI journal article supplement (doi:10.3390/ijms24043591), 2023-02-10
Supplement: s1 [file s1]

Table S2. Spearman’s rank correlations of sIL-2R levels with plasma MMP-9 and specific pathological marker levels in CP, CV, and ID.

|        |             | CP     |                |         | CV     |                |       | ID |       |   |
|--------|-------------|--------|----------------|---------|--------|----------------|-------|----|-------|---|
|        |             | r      | 95%CI          | p       | r      | 95%CI          | p     | r  | 95%CI | p |
| sIL-2R | MMP-9       | 0.441  | 0.096, 0.691   | <0.05   | -0.505 | -0.769, -0.094 | <0.05 | ND |       |   |
|        | Lymphocytes | -0.484 | -0.723, -0.143 | <0.01   | -0.191 | -0.575, 0.262  | 0.405 | ND |       |   |
|        | CRP         | 0.732  | 0.510, 0.863   | <0.0001 | 0.193  | -0.261, 0.576  | 0.403 | ND |       |   |
|        | D-dimer     | 0.760  | 0.556, 0.878   | <0.0001 | 0.250  | -0.216, 0.624  | 0.288 | ND |       |   |
|        | Ferritin    | 0.504  | 0.183, 0.728   | <0.01   | 0.240  | -0.214, 0.608  | 0.295 | ND |       |   |
|        | S/F ratio   | -0.637 | -0.809, -0.365 | <0.001  | -0.277 | -0.633, 0.175  | 0.224 | ND |       |   |
